# Supplementary material for: Molecular Subtypes as a Basis for Stratified Use of Neoadjuvant Chemotherapy for Muscle-Invasive Bladder Cancer—A Narrative Review
Source: MDPI journal article supplement (doi:10.3390/cancers14071692), 2022-03-26
Supplement: s1 [file s1]

# Molecular Subtypes as a Basis for Stratified Use of Neoadjuvant Chemotherapy for Muscle-Invasive Bladder Cancer—A Narrative Review

Gottfrid Sjö Dahl, Johan Abrahamsson, Carina Bernardo, Pontus Eriksson, Mattias Höglund and Fredrik Liedberg

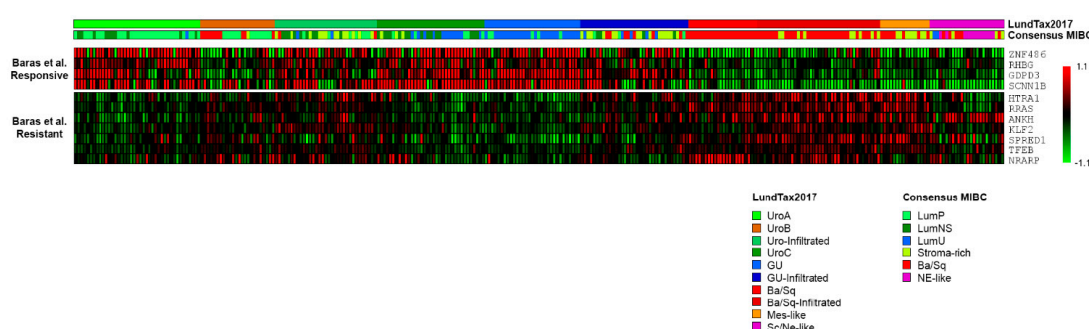

**Figure S1.** Genes associated with NAC response/resistance in Baras et al. [48] are expressed in luminal and Basal/squamous MIBC subtypes, respectively. The 21 genes shown in Figure1 of Baras et al. [38] identified as associated with NAC response were investigated in the Lund2017 consecutive RC cohort gene expression data set ( $n = 307$ ). All mapped genes in the responsive cluster were highly expressed in luminal-like subtypes, whereas all mapped genes in the Baras et al. Resistant cluster were highly expressed in the Ba/Sq subtype.

**Table S1.** Fraction of chemotherapy response in Taber et al. [20] ( $n = 121$ ), stratified by consensus subtypes, treatment setting, and DDR-mutations. Number of cases with a potentially predictive mutation (ERCC2, BRCA2, or any DDR-mutation) or wild-type for all three mutation types, is shown separately for responders treated with NAC (left) or first-line only (right). Based on manual review of source data from Taber et al [20]. The last columns show the fraction of responders with presence of at least one of the three potentially predictive mutation types.

| Chemotherapy response by consensus subtype, treatment setting, and DDR-mutation status in Taber et al. 2020 |              |       |       |     |      |                  |       |       |     |      |                                        |
|-------------------------------------------------------------------------------------------------------------|--------------|-------|-------|-----|------|------------------|-------|-------|-----|------|----------------------------------------|
| Consensus Subtype                                                                                           | NAC-Response | ERCC2 | BRCA2 | DDR | 3xWT | 1L only-Response | ERCC2 | BRCA2 | DDR | 3xWT | % of responses explained by DDR-status |
| LumP                                                                                                        | 9/15 (60%)   | 1     | 2     | 1   | 7    | 21/29 (72%)      | 3     | 3     | 8   | 12   | 37% (NAC: 22%, 1L only: 43%)           |
| LumU                                                                                                        | 8/10 (80%)   | 2     | 2     | 2   | 5    | 10/15 (66%)      | 1     | 2     | 5   | 4    | 50% (NAC: 37%, 1L only: 60%)           |
| Stroma-rich                                                                                                 | 6/7 (86%)    | 2     | 2     | 5   | 1    | 7/11 (64%)       | 0     | 1     | 0   | 6    | 46% (NAC: 83%, 1L only: 14%)           |
| BASQ                                                                                                        | 6/12 (50%)   | 3     | 2     | 3   | 2    | 9/20 (45%)       | 1     | 1     | 3   | 5    | 53% (NAC: 67%, 1L only: 44%)           |
| NE-like                                                                                                     | -            | -     | -     | -   | -    | 1/1 (100%)       | 0     | 0     | 0   | 1    | 0% (1L only: 0%)                       |
